RESEARCH ARTICLE

# Neighbourhood composition dictates expression of soil legacy effects on plant growth

Kenneth J. Oppon<sup>1</sup>\*, Charlotte Brown<sup>1</sup>, Isaac Peetoom Heida<sup>1</sup>†, James F. Cahill, Jr.<sup>‡</sup>

Department of Biological Sciences, University of Alberta, Edmonton, Alberta, Canada

☉ These authors contributed equally to this work

‡ These authors also contributed equally to this work

\* [oppon@ualberta.ca](mailto:oppon@ualberta.ca)

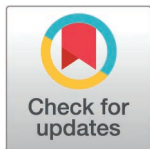

## Abstract

Soil legacies, which reflect the influence of previous vegetation on soil biota and other properties, are increasingly recognized as drivers of current plant performance and community dynamics. Yet the expression of these legacies often depends on a focal plant's immediate neighbours. We tested how soil biota from adjacent grassland and wolf-willow (*Elaeagnus commutata*) shrublands—representing a common shrub-encroachment transition in the northern prairies—affected the growth of *Agrostis scabra* when grown alone or with grass (*Festuca hallii*) or forb (*Geum triflorum*) neighbours. When grown alone, *A. scabra* responded differently across soil origins: grassland soil biota had a neutral effect, whereas wolf-willow strongly reduced growth. Neighbour presence modified these outcomes. In wolf-willow soils, the negative soil biota effect was no longer detectable with either neighbour individually, but re-emerged when both neighbours co-occurred, indicating non-additive interactions. In grassland soils, *G. triflorum* alone induced a negative effect that disappeared in the multi-neighbour treatment. Differences in soil chemistry, particularly the lower pH of wolf-willow soils, may have further shaped how microbial communities mediate plant responses. Overall, our findings demonstrate that soil biota effects on plant growth are not fixed by soil origin but are dictated by a plant's neighbourhood composition, including neighbour identity, density, and their interaction with the abiotic context. Understanding these context-dependent soil legacies is essential for interpreting and predicting vegetation change and species coexistence across communities.

## OPEN ACCESS

**Citation:** Oppon KJ, Brown C, Peetoom Heida I, Cahill JF (2026) Neighbourhood composition dictates expression of soil legacy effects on plant growth. PLoS One 21(2): e0342996. <https://doi.org/10.1371/journal.pone.0342996>

**Editor:** Tzen-Yuh Chiang, National Cheng Kung University, TAIWAN

**Received:** April 19, 2025

**Accepted:** January 29, 2026

**Published:** February 17, 2026

**Copyright:** © 2026 Oppon et al. This is an open access article distributed under the terms of the [Creative Commons Attribution License](https://creativecommons.org/licenses/by/4.0/), which permits unrestricted use, distribution, and reproduction in any medium, provided the original author and source are credited.

**Data availability statement:** All data are available on a figshare database (DOI: 10.6084/m9.figshare.24512653, URL: <https://figshare.com/s/72be8af2fa2f07ddfc3b>).

**Funding:** JFC: NSERC Discovery grant Natural Sciences and Engineering Research Council of Canada [https://www.nserc-crsng.gc.ca/index\\_eng.asp](https://www.nserc-crsng.gc.ca/index_eng.asp) The funders had no role in study

## Introduction

For decades, theories of plant community dynamics were dominated by abiotic explanations, attributing successional change primarily to competition for limiting resources and gradual shifts in soil physical properties [1–3]. More recently, changes to the soil biotic community have been recognized as an equally crucial driver of these dynamics [4–6]. Unlike many abiotic processes, biotic soil legacies, defined here as

design, data collection and analysis, decision to publish, or preparation of the manuscript.

**Competing interests:** The authors have declared that no competing interests exist.

plant-mediated changes to soil microbial communities driven by prior occupancy, can develop rapidly and influence plant communities on much shorter timescales [7,8]. This perspective is particularly relevant in ecosystems composed of a mosaic of vegetation states, such as savannahs, where transitions between shrublands and grasslands may not result from changes to abiotic factors alone but are actively mediated or reinforced by the changes to soil biota [9,10].

The expression of these soil legacies, however, is highly context dependent. While the specific microbial assemblage that forms a soil legacy is determined by the plants that created it [11,12], its effect on new individuals depends on the traits of the responding plant [13], local abiotic conditions [14,15], and critically, the surrounding neighbourhood of plants whose roots overlap or share soil microbial communities [16,17]. Neighbouring plants can modify the influence of soil biota in multiple ways—by competing for benefits conferred by mutualists [18], amplifying pathogen impacts [19], promoting distinct soil organisms [20], or restricting their establishment altogether [21,22]. Through such mechanisms, neighbour identity and density, and more broadly the composition of the surrounding plant neighbourhood, can generate fine-scale heterogeneity in how soil legacies manifest within plant communities.

Despite growing recognition of this complexity [23], much of our understanding of soil legacy effects arise from simplified experimental systems, such as plants grown in monocultures or in isolation [24]. While foundational, these approaches often overlook the non-additive and synergistic interactions that emerge in diverse community settings [17,25]. Although several studies have examined soil legacies in more diverse or field-based contexts, explicit manipulations of neighbour identity, density, and community context remain rare [26]. Consequently, the role of soil biota as context-dependent mediators of plant interactions remains underexplored in realistic, multi-species settings [6,27].

Beyond within community variation, soil legacies can also differ across contrasting vegetation states. Comparing the soil biota associated with distinct community types can reveal how vegetation shifts alter the belowground communities and, in turn, alter plant diversity and composition [10,28,29]. In the Aspen Parkland of Alberta, for instance, shrub encroachment by the nitrogen fixing *Elaeagnus commutata* Bernh. ex Rydb (wolf-willow) marks a successional shift from grassland to shrub-dominated states. While such transitions alter the chemical soil environment [30] they may also reshape the soil biotic community. This reshaping, in turn, could influence plant diversity in shrub encroached areas compared to shrub free counterparts [31]. However, because local plant neighbourhoods can further modulate these biotic effects [32,33], the influence of soil legacies are unlikely to be uniform across neighbourhood contexts.

Here, we test how variation in a plant's local community—through changes in neighbour identity and density—modifies the influence of soil biota on plant growth. Specifically, we compare soils from wolf-willow shrubland and wolf-willow-free grassland communities on plants grown alone, and with interspecific neighbours at two densities. This approach allows us to assess whether the influence of soil biota is a fixed property of community type or an emergent outcome shaped by local neighbourhood interactions.

## Methods

A three-month greenhouse experiment was conducted to test how soil biota from grassland and wolf-willow shrubland communities in the Aspen Parkland ecoregion of central Alberta influence plant growth. These soils were selected based on evidence that wolf-willow encroachment alters community composition beneath the shrub [30,31]. Wolf-willow is a dominant actinorhizal shrub capable of increasing nitrogen inputs, altering soil pH, resulting in distinct understory assemblages compared to adjacent wolf-willow-free grasslands [34,35]. Although such abiotic differences are well documented, the extent to which wolf-willow also modifies soil biota and their subsequent effects on plant growth remains unclear.

The initial experimental design was factorial: we used soils collected from two community types (grassland and wolf-willow) x from 20 field plots x 2 sterilization treatments (live vs sterile) x 4 replicates, for a total of 320 pots. Each pot was sown with a three-species mixture consisting of two grasses, *Agrostis scabra* (L.) and *Festuca hallii* (Vasey), and a forb, *Geum triflorum* (Pursh). Pots received three seeds per species that were surface sterilized prior to sowing (see below). These species were selected because they commonly co-occur in grassland communities at our study site (32) and showed consistent germination in preliminary trials using locally collected seed.

However, variable germination of *F. hallii* and *G. triflorum* altered the final design, as *A. scabra* germinated most reliably (306 of the 320 pots). We therefore focused on *A. scabra* as the focal species to test how soil biota influenced its growth under four neighbour contexts: (1) *A. scabra* grown alone, (2) with *G. triflorum* as a neighbour, (3) with *F. hallii* as a neighbour, (4) or with both species together (Fig 1). Each species was represented by a single individual per pot, with excess seedlings removed shortly after germination. Although replication among neighbour treatments was unbalanced (Table 1), this structure allowed us to assess whether different neighbour scenarios modified the effect of soil biota on *A. scabra* growth.

### Field-soil origin and collection

Field soils were collected in September 2019 at the Roy Berg Kinsella Research Ranch (Kinsella, Alberta), a savannah type landscape with interspersed shrub and forest patches within predominantly herbaceous grasslands. Because this property is entirely owned and managed by the University of Alberta, and the study did not involve protected species or restricted areas, no external permits were required for site access or sample collection. At each of 10 locations within a

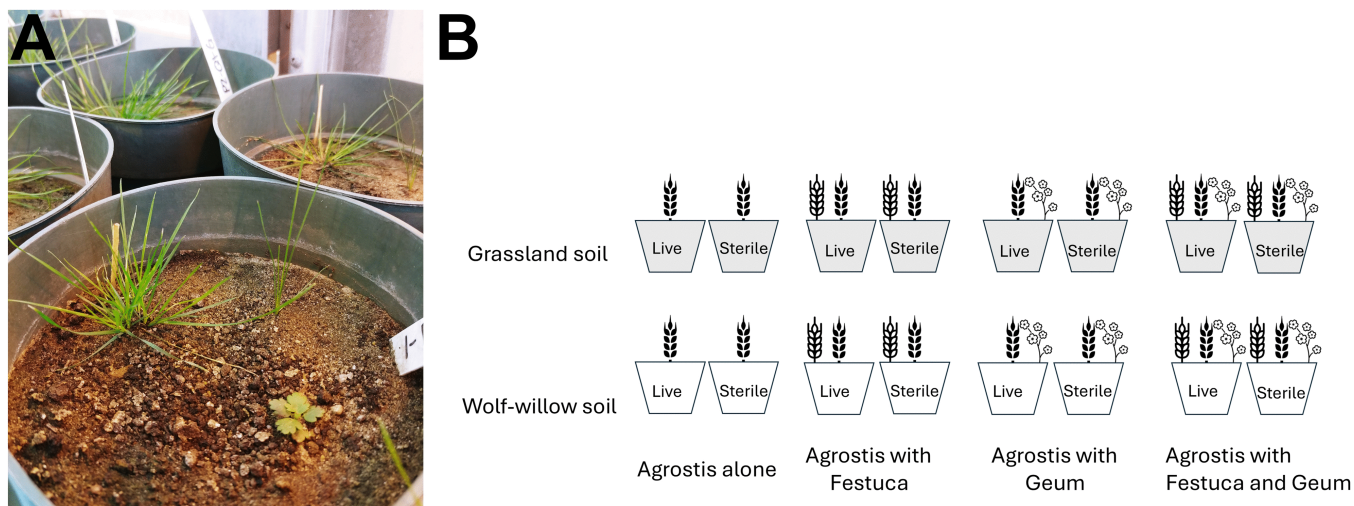

**Fig 1. Setup of greenhouse experiment.** (A) Photograph of pots representing a neighbour x soil origin x sterilization treatment. (B) Diagram illustrating the full set of neighbour, soil origin, and sterilization treatments.

<https://doi.org/10.1371/journal.pone.0342996.g001>

**Table 1. Shoot biomass ( $\pm$ SEM) of *Agrostis scabra* plants grown in four neighbour treatments across different soil origin and sterilization treatments. A priori comparisons were performed among measurements on individuals in adjacent rows and shaded in the same way. Boldface denotes significant differences based on planned pairwise comparisons of model estimates, with alpha set at 0.05. Treatments are illustrated in Fig 1.**

| Neighbour treatment            | Soil origin and sterilization treatment | n  | Shoot biomass (g) | p-value       |
|--------------------------------|-----------------------------------------|----|-------------------|---------------|
| Agrostis alone                 | Grassland live                          | 9  | 0.682 $\pm$ 0.062 | 0.1141        |
|                                | Grassland sterile                       | 8  | 0.548 $\pm$ 0.039 |               |
| Agrostis with Festuca          | Grassland live                          | 30 | 0.600 $\pm$ 0.037 | 0.7121        |
|                                | Grassland sterile                       | 32 | 0.577 $\pm$ 0.032 |               |
| Agrostis with Geum             | Grassland live                          | 13 | 0.624 $\pm$ 0.059 | <b>0.0529</b> |
|                                | Grassland sterile                       | 4  | 0.816 $\pm$ 0.077 |               |
| Agrostis with Festuca and Geum | Grassland live                          | 26 | 0.545 $\pm$ 0.027 | 0.5292        |
|                                | Grassland sterile                       | 32 | 0.584 $\pm$ 0.028 |               |
| Agrostis alone                 | Wolf-willow live                        | 8  | 0.509 $\pm$ 0.060 | <b>0.0288</b> |
|                                | Wolf-willow sterile                     | 3  | 0.763 $\pm$ 0.044 |               |
| Agrostis with Festuca          | Wolf-willow live                        | 33 | 0.544 $\pm$ 0.033 | 0.1613        |
|                                | Wolf-willow sterile                     | 42 | 0.602 $\pm$ 0.029 |               |
| Agrostis with Geum             | Wolf-willow live                        | 8  | 0.528 $\pm$ 0.054 | 0.9795        |
|                                | Wolf-willow sterile                     | 8  | 0.531 $\pm$ 0.057 |               |
| Agrostis with Festuca and Geum | Wolf-willow live                        | 25 | 0.526 $\pm$ 0.030 | <b>0.0181</b> |
|                                | Wolf-willow sterile                     | 24 | 0.646 $\pm$ 0.041 |               |

<https://doi.org/10.1371/journal.pone.0342996.t001>

50-ha area, paired 3 x 3m plots established in a previous study were sampled [30]: one within a wolf-willow stand (mean density = 2.91 m<sup>-2</sup>) and one in an adjacent grassland area (<1% wolf-willow cover) within 10 m.

Each plot was subdivided into four 1.5 x 1.5m quadrants. Within each quadrant, four soil cores (5 cm diameter x 20 cm depth) were collected 0.5 m inward from the corners, approximately 1m apart. Soils from the two upper quadrants and lower quadrants were pooled separately, producing two homogenized soil samples per plot. In total, there were 40 unique soils (10 locations x 2 community plots x 2 samples per plot). Soil samples were refrigerated at 4°C for four days before use.

### Greenhouse experiment

Seeds were collected from multiple locations within the study site over the two growing seasons prior to the experiment. All seeds were surface sterilized in a 5% bleach solution for two minutes then rinsed three times with Milli-Q water.

Pots (15 cm diameter x 14.5 cm depth) were filled with 1L of soil. Soils were a 9:1 ratio of sterilized background soil with live or sterilized field soil as inoculum. Background and inoculum soils were thoroughly homogenized within pots to ensure even distribution of microbial communities. This ratio minimized abiotic differences while maintaining representative microbial effects [36]. The background soil used is a 3:1 ratio of sand and topsoil (upper 20 cm; obtained from Canar Rock Products Ltd. in Edmonton AB, Canada). Sterilization of field and background soils was achieved by autoclaving for 3 hours at 121°C. Although we acknowledge that autoclaving may not eliminate all microbial propagules, this approach has been used to substantially reduce viable soil biota and create a functionally sterile control for other plant-soil interaction experiments [37,38].

Three seeds of each species were sown into each pot across our four soil treatments: live grassland, sterile grassland, live wolf-willow, and sterile wolf-willow. Seeds were positioned approximately 2 cm inward from the pot edge and spaced approximately 2 cm apart. After germination, seedlings were thinned to one individual per species per pot. Pots were distributed across four spatial blocks, with positions randomized within each block. Plants were grown in the University

of Alberta's Biotron greenhouse, and pots were hand-watered from above every 1–3 days, adjusting the amount of water to maintain soils in a moist but not saturated condition. After three months, shoots of each species were clipped at the surface, dried at 60°C for 48 hours, and then weighed.

### Statistical analyses

All analyses were performed with R statistical software [39]. The data were visually inspected to confirm normality and homoscedasticity.

Effects of soil biota on *A. scabra* shoot biomass were tested using a linear mixed-effects model (function 'lmer' from the lme4 package v. 1.1.29, [40]) and evaluated with an ANOVA. Fixed factors included soil community origin (grassland, wolf-willow), soil sterilization (live, sterile), and neighbour treatment (alone, *F. hallii*, *G. triflorum*, both). Block was included as a random factor. Field plot origin explained negligible variance (SD=0.00) and was excluded.

Potential outliers were assessed using a t-test on studentized residuals (function 'outlierTest' from the car package [41]). One observation was removed due to excessive influence (Bonferroni-adjusted p-value <0.01). Planned contrasts comparing live vs sterile soils within each neighbour treatment were conducted using the pairs function in emmeans [42]. Because these contrasts were predefined by the experimental design, no multiple comparison correction were applied.

### Results

There was a significant three-way interaction between soil sterilization, soil community origin, and neighbour treatment on *A. scabra* shoot production ( $F_{3,287.6} = 2.90, p = 0.03$ ; Table 2). Because this interaction conditions all lower-order effects, we focus our interpretation on this, as the main effects and two-way interactions cannot be meaningfully interpreted in isolation. The result indicates that the effect of soil sterilization on shoot production depended jointly on soil origin and neighbour identity (Fig 2).

In grassland soils, sterilization tended to reduce shoot production when *A. scabra* was grown alone (–20%), although this difference was not statistically significant ( $p = 0.11$ ). When *G. triflorum* was present, sterilization significantly increased shoot production (+30%;  $p = 0.05$ ), whereas no significant sterilization effects were detected when *A. scabra* grew with *F. hallii* or with both neighbours simultaneously ( $p > 0.1$ ).

In wolf-willow soils, sterilization significantly increased shoot production when *A. scabra* was grown alone (+49%;  $p = 0.02$ ). This positive effect of sterilization disappeared when either neighbour species was present individually ( $p > 0.1$ ). However, when both neighbours were present simultaneously, sterilization again significantly increased shoot production

**Table 2. ANOVA table for the effects of neighbour, community soil origin and sterilization treatments on *Agrostis scabra* shoot production.**

| Source of Variation                          | Shoot biomass     |                   |         |              |
|----------------------------------------------|-------------------|-------------------|---------|--------------|
|                                              | DF <sub>num</sub> | DF <sub>den</sub> | F-value | P-value      |
| Neighbour                                    | 3                 | 287.58            | 0.451   | 0.716        |
| Community origin                             | 1                 | 286.03            | 0.732   | 0.392        |
| Sterilization                                | 1                 | 286.37            | 4.782   | <b>0.029</b> |
| Neighbour x Community origin                 | 3                 | 287.61            | 1.706   | 0.165        |
| Neighbour x Sterilization                    | 3                 | 287.22            | 0.651   | 0.582        |
| Community origin x Sterilization             | 1                 | 286.39            | 3.736   | <b>0.054</b> |
| Neighbour x Community origin x Sterilization | 3                 | 287.66            | 2.936   | <b>0.033</b> |

DF<sub>num</sub> = Numerator degrees of freedom.

DF<sub>den</sub> = Kenward-Roger adjusted denominator degrees of freedom.

<https://doi.org/10.1371/journal.pone.0342996.t002>

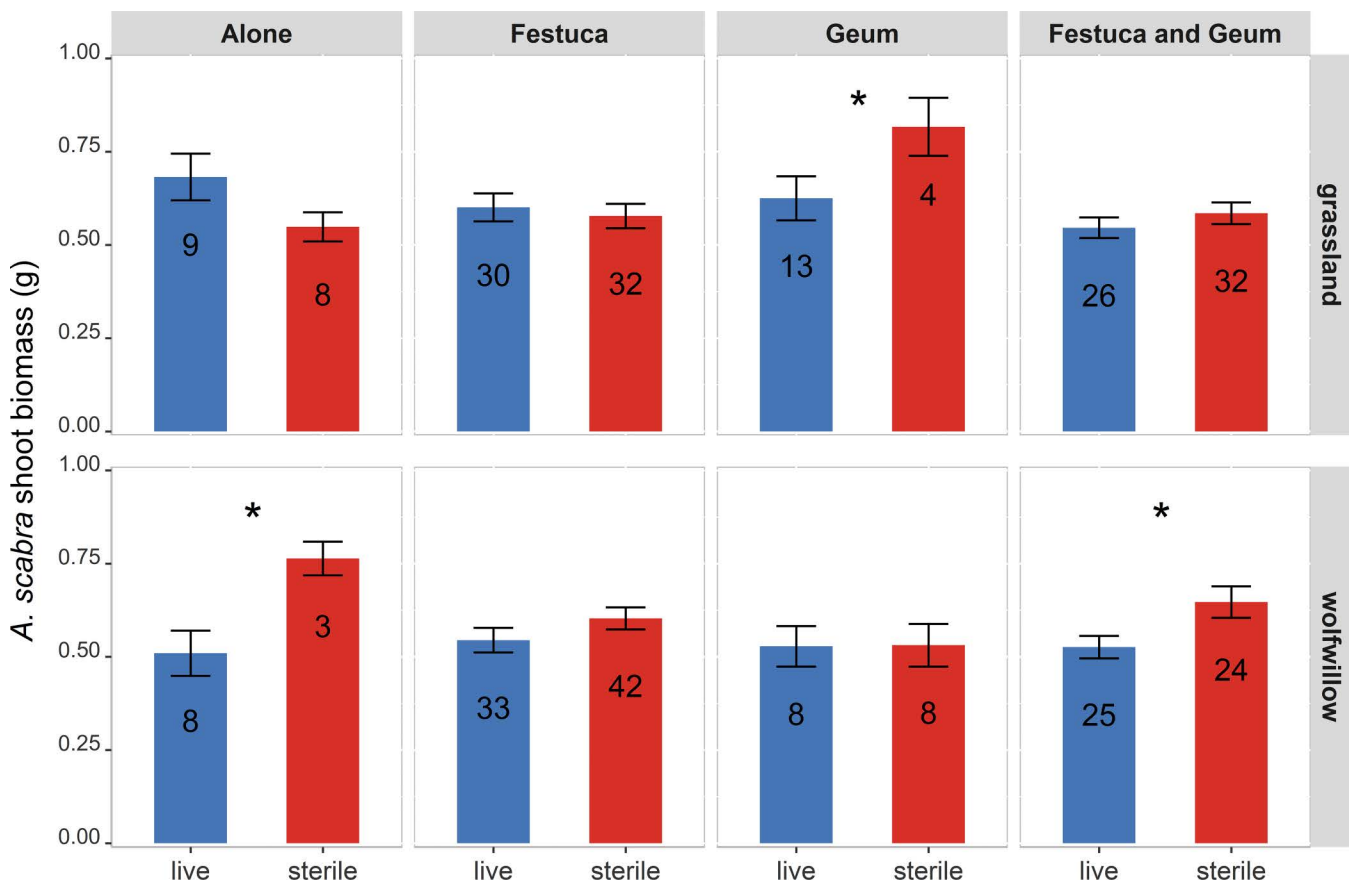

**Fig 2. Mean ( $\pm$  SEM) shoot biomass of *Agrostis scabra* across neighbour treatments in live vs. sterile soils from two communities.** Columns show neighbour identity; rows show soil community origin. Asterisks indicate significant live–sterile differences within neighbour treatments ( $\alpha=0.05$ ).

<https://doi.org/10.1371/journal.pone.0342996.g002>

(+20%;  $p=0.01$ ), suggesting that the joint presence of the two neighbours reinstated biotic constraints that were absent under single-neighbour conditions.

## Discussion

We found that the net effect of soil biota on the grass *A. scabra* was not fixed but varied with its local neighbourhood context. When grown alone, soils from grassland and wolf-willow communities produced divergent biotic effects on *A. scabra* shoot production: in grassland soils the effect of the biota was positive but not statistically significant, consistent with findings that early successional soils often exert neutral to positive effects on heterospecifics [8,43], whereas wolf-willow soil biota strongly limited growth. This contrast suggests that soil biota associated with wolf-willow communities impose stronger negative legacy effects on *A. scabra* consistent with broader evidence that plant performance differs across habitats due to variation in soil microbial community effects [6,24]. Our finding provides the first evidence that such biotic effects may contribute to performance differences between grassland and wolf-willow communities in the Aspen Parkland.

Crucially, these baseline soil legacy effects were not static. Neighbourhood structure altered both the direction and or magnitude of the soil biota effects, demonstrating that the expression of soil legacies is strongly context-dependent. Taken together, our results highlight that the influence of soil biota on plant growth is not fixed but emerges from the interaction

between soil origin and a plant's local neighbourhood [26,44]. This points to a need to move beyond a simplified pairwise perspectives and instead evaluate plant-soil interactions in their full community context.

In grassland soils, neighbour identity was the primary modifier of soil legacies. When *G. triflorum* was present, the effect of soil biota on *A. scabra* shifted from neutral to negative, as sterilization increased shoot production only in this neighbour context. This pattern indicates that *G. triflorum* altered the expression of soil biota effects rather than introducing new deleterious microbes. Similar findings in other systems show that specific neighbours can reshape rhizosphere conditions or filter soil microbial communities in ways that modify soil-legacy outcomes [22,45,46].

Functional differences between forbs and graminoids likely contribute to these neighbour-dependent outcomes, particularly through their distinct impacts through soil inputs. Forbs and graminoids often differ in root exudate quality and litter inputs into soils [47,48]. For instance, Steltzer and Bowman [49] demonstrated that *Geum rossii* (a congener of *G. triflorum*) modifies soil carbon and nitrogen dynamics differently than co-occurring grasses, potentially creating soil conditions that select for distinct microbial communities. Such species-specific root activity can rapidly select for distinct microbial communities even over short timescales [48].

Furthermore, our finding challenges the assumption that phylogenetic relatedness reliably predicts soil legacy effects. Ecological theory often predicts that closely related species should amplify soil effects through accumulation of shared host pathogens or mutualists [23,50]. However, in our case, the phylogenetically similar neighbour did not strongly influence the outcome. Rather, it was the phylogenetically distant forb, *G. triflorum*, that shifted the outcome from neutral to strongly negative in grassland soils. This aligns with recent arguments that relatedness is often a poor predictor of biotic soil effects because traits driving microbial associations do not strictly track phylogeny [51,52]. Specifically, this suggests that the forb neighbour promotes a distinct microbial assemblage that acts antagonistically toward *A. scabra*. *G. triflorum* likely recruits or tolerates microbial taxa that it can withstand, but which prove deleterious to *A. scabra*. By driving such shifts in the rhizosphere composition, local plant associations determine which microbial taxa become most ecologically influential [20,21].

In wolf-willow soils, however, the modifier of soil legacy effects shifted from neighbour identity to neighbourhood composition. When *A. scabra* grew alone, live soil biota had a clear negative effect on shoot production. Yet, in contrast to the identity-specific effects observed in grasslands, the presence of *either* neighbour individually nullified the negative soil biota effect. Strikingly, when both neighbours were present simultaneously, the negative soil-biota effect was again expressed, although at a reduced magnitude. This re-emergence of the negative effect suggests that increasing neighbourhood complexity—and the associated increase in plant density—alters how existing soil legacies are expressed [17,53–55].

Mechanistically, these non-additive outcomes likely arise because the rhizosphere that forms when species co-occur can differ markedly from those maintained by each species alone [48,56]. Rather than simply summing the distinct soil inputs described above, the combined presence of graminoids and forbs creates a unique rhizosphere environment. We propose that while each neighbour individually modifies the soil environment against harmful biota for *A. scabra* in wolf-willow soil, their combined interaction shifts rhizosphere conditions in a way that allows deleterious microbial components to reestablish influence [57,58]. These effects may be particularly pronounced when functionally distinct groups co-occur, as the interaction between differing belowground strategies can unpredictably shift microbial dominance [14,59,60]. Together, these results suggest that soil legacy effects emerge through neighbour-mediated changes in the expression of soil biota, rather than as predictable, additive extensions of pairwise plant–soil interactions [6].

An important context for understanding the net biotic effects we observed is the underlying soil chemistry of our study system. Previous studies have attributed performance differences between plants in grasslands and wolf-willow soils to variation in soil chemistry [34], specifically due to the nitrogen-fixing capacity of wolf-willow plants [35]. However, recent work at our study site found minimal differences in nutrient availability, including nitrogen, [30], but did report consistently lower pH in wolf-willow soils. Soil acidity can strongly shape microbial community composition and function [61–63],

potentially favouring taxa less beneficial—or even antagonistic—to *A. scabra*. This chemical context helps explain the baseline differences we observed: the acidic stress of wolf-willow soils may promote a baseline community of antagonistic microbes (detectable when *A. scabra* grows alone), whereas grassland soils require the specific influence of *G. triflorum* to induce a similar negative effect. Essentially, the microbes that become influential only in the presence of *G. triflorum* in grassland soils may be naturally dominant under the more acidic conditions of wolf-willow soils, thereby driving the strong negative legacy observed in that environment.

While these results reveal strong context-dependence in how plants experience soil legacies, several limitations should be acknowledged. Without direct characterization of the soil microbial communities or data on root colonization, the specific agents and mechanisms driving the observed interactions remain unresolved. Because we measured only aboveground responses, key belowground processes—such as root biomass allocation or mycorrhizal colonization—may have contributed to these patterns but were not captured [64,65]. Moreover, by focusing on a single focal species and a limited set of neighbour combinations, our ability to generalize to the broader community is restricted. Greenhouse conditions also constrain interpretation, as soil legacies and neighbour effects may shift under the variable and heterogeneous conditions of field environments [25,66]. Future studies that pair microbial sequencing with root-level analyses could identify the mutualists and antagonists mediating these soil legacies [67] while reciprocal field experiments would test whether the patterns observed here persist under natural environmental variability. Extending these approaches across multiple focal species and more diverse neighbour assemblages would clarify whether the context-dependence observed here is a general feature of soil legacies or a species-specific outcome.

## Conclusion

Together, these results offer a coherent picture of how local neighbourhoods and community legacies jointly shape plant performance. Our findings underscore that a plant's immediate community context plays a crucial role in determining how it experiences biotic soil legacies. These effects were not fixed by the soil community's origin alone but shifted with neighbour identity, neighbourhood complexity, and through non-additive interactions among neighbours.

Across communities, *A. scabra* faced disadvantage through different pathways: In wolf-willow soils, negative soil-biota legacies strongly suppressed growth when plants grew alone, but the expression of this negative effect changed when neighbours were present individually and reappeared when neighbours co-occurred. In grassland soils, generally neutral legacies became negatively expressed only in the presence of particular neighbours such as *G. triflorum*. This contrast illustrates that soil legacies and neighbour effects interact in distinct ways across environments, producing outcomes that cannot be predicted from community type or soil origin alone.

In essence, soil-legacy effects emerge from fine-scale biotic interactions embedded within local neighbourhoods rather than from static community-level properties. In grassland-shrubland mosaics such as those represented in our study system, where community boundaries and species can be diffuse, this context dependence suggests that vegetation dynamics are driven by more than just soil conditioning. Specifically, the strong negative legacies observed in wolf-willow soils suggest that soil biota act as a barrier to the establishment of *A. scabra* (and potentially similar species), effectively filtering which species can colonize shrub patches. However, our finding that neighbours can mask these effects implies that this biotic resistance is not absolute. Consequently, the ability of *A. scabra* (and other similar species) to persist in or recolonize shrub-dominated soils may depend less on its intrinsic tolerance to shrub legacies and more on the buffering capacity provided by specific neighbour associations.

## Author contributions

**Conceptualization:** Kenneth J. Oppon, Charlotte Brown.

**Data curation:** Kenneth J. Oppon.

**Formal analysis:** Charlotte Brown.

**Funding acquisition:** James F. Cahill Jr.

**Investigation:** Kenneth J. Oppon.

**Methodology:** Kenneth J. Oppon, Charlotte Brown, Isaac Peetoom Heida.

**Supervision:** James F. Cahill Jr.

**Visualization:** Kenneth J. Oppon.

**Writing – original draft:** Kenneth J. Oppon, Charlotte Brown.

**Writing – review & editing:** Kenneth J. Oppon, Charlotte Brown, Isaac Peetoom Heida, James F. Cahill Jr.

## References

1. Grime JP. Evidence for the existence of three primary strategies in plants and its relevance to ecological and evolutionary theory. *Am Nat.* 1977;111:1169–94.
2. Odum EP. The strategy of ecosystem development. *Science.* 1969;164(3877):262–70. <https://doi.org/10.1126/science.164.3877.262> PMID: [5776636](https://pubmed.ncbi.nlm.nih.gov/5776636/)
3. Tilman D. Resource competition and community structure. Princeton University Press. 1982.
4. Bever JD, Westover KM, Antonovics J. Incorporating the soil community into plant population dynamics: The utility of the feedback approach. *The Journal of Ecology.* 1997;85(5):561. <https://doi.org/10.2307/2960528>
5. Reynolds HL, Packer A, Bever JD, Clay K. Grassroots ecology: Plant–microbe–soil interactions as drivers of plant community structure and dynamics. *Ecology.* 2003;84(9):2281–91. <https://doi.org/10.1890/02-0298>
6. van der Putten WH, Bardgett RD, Bever JD, Bezemer TM, Casper BB, Fukami T, et al. Plant–soil feedbacks: the past, the present and future challenges. *J Ecology.* 2013;101(2):265–76. <https://doi.org/10.1111/1365-2745.12054>
7. Kardol P, Bezemer TM, van der Putten WH. Temporal variation in plant-soil feedback controls succession. *Ecol Lett.* 2006;9(9):1080–8. <https://doi.org/10.1111/j.1461-0248.2006.00953.x> PMID: [16925657](https://pubmed.ncbi.nlm.nih.gov/16925657/)
8. Van der Putten WH, Van Dijk C, Peters BAM. Plant-specific soil-borne diseases contribute to succession in foredune vegetation. *Nature.* 1993;362(6415):53–6. <https://doi.org/10.1038/362053a0>
9. D’Odonico P, Okin GS, Bestelmeyer BT. A synthetic review of feedbacks and drivers of shrub encroachment in arid grasslands. *Ecology.* 2011;5(5):520–30. <https://doi.org/10.1002/eco.259>
10. Maestre FT, Bowker MA, Puche MD, Belén Hinojosa M, Martínez I, García-Palacios P, et al. Shrub encroachment can reverse desertification in semi-arid Mediterranean grasslands. *Ecol Lett.* 2009;12(9):930–41. <https://doi.org/10.1111/j.1461-0248.2009.01352.x> PMID: [19638041](https://pubmed.ncbi.nlm.nih.gov/19638041/)
11. Bever JD. Soil community feedback and the coexistence of competitors: Conceptual frameworks and empirical tests. *New Phytol.* 2003;157(3):465–73. <https://doi.org/10.1046/j.1469-8137.2003.00714.x> PMID: [33873396](https://pubmed.ncbi.nlm.nih.gov/33873396/)
12. Bezemer TM, Lawson CS, Hedlund K, Edwards AR, Brook AJ, Igual JM, et al. Plant species and functional group effects on abiotic and microbial soil properties and plant–soil feedback responses in two grasslands. *J Ecol.* 2006;94(5):893–904. <https://doi.org/10.1111/j.1365-2745.2006.01158.x>
13. Cortois R, Schröder-Georgi T, Weigelt A, van der Putten WH, De Deyn GB. Plant–soil feedbacks: role of plant functional group and plant traits. *J Ecol.* 2016;104(6):1608–17. <https://doi.org/10.1111/1365-2745.12643>
14. Ballhorn DJ, Schädler M, Elias JD, Millar JA, Kautz S. Friend or Foe—Light Availability Determines the Relationship between Mycorrhizal Fungi, Rhizobia and Lima Bean (*Phaseolus lunatus* L.). *PLoS One.* 2016;11(5):e0154116. <https://doi.org/10.1371/journal.pone.0154116> PMID: [27136455](https://pubmed.ncbi.nlm.nih.gov/27136455/)
15. Manning P, Morrison SA, Bonkowski M, Bardgett RD. Nitrogen enrichment modifies plant community structure via changes to plant-soil feedback. *Oecologia.* 2008;157(4):661–73. <https://doi.org/10.1007/s00442-008-1104-0> PMID: [18629543](https://pubmed.ncbi.nlm.nih.gov/18629543/)
16. Callaway RM, Mahall BE, Wicks C, Pankey J, Zabinski C. Soil fungi and the effects of an invasive forb on grasses: Neighbor identity matters. *Ecology.* 2003;84(1):129–35. [https://doi.org/10.1890/0012-9658\(2003\)084\[0129:sfateo\]2.0.co;2](https://doi.org/10.1890/0012-9658(2003)084[0129:sfateo]2.0.co;2)
17. Hendriks M, Mommer L, de Caluwe H, Smit-Tiekstra AE, van der Putten WH, de Kroon H. Independent variations of plant and soil mixtures reveal soil feedback effects on plant community overyielding. *J Ecol.* 2013;101(2):287–97. <https://doi.org/10.1111/1365-2745.12032>
18. Crawford KM, Knight TM. Competition overwhelms the positive plant-soil feedback generated by an invasive plant. *Oecologia.* 2017;183(1):211–20. <https://doi.org/10.1007/s00442-016-3759-2> PMID: [27796508](https://pubmed.ncbi.nlm.nih.gov/27796508/)
19. Petermann JS, Fergus AJF, Turnbull LA, Schmid B. Janzen-Connell effects are widespread and strong enough to maintain diversity in grasslands. *Ecology.* 2008;89(9):2399–406. <https://doi.org/10.1890/07-2056.1> PMID: [18831160](https://pubmed.ncbi.nlm.nih.gov/18831160/)
20. Mummey DL, Rillig MC, Holben WE. Neighboring plant influences on arbuscular mycorrhizal fungal community composition as assessed by T-RFLP analysis. *Plant Soil.* 2005;271(1–2):83–90. <https://doi.org/10.1007/s11104-004-2066-6>

21. Mony C, Gaudu V, Ricono C, Jambon O, Vandenkoornhuysen P. Plant neighbours shape fungal assemblages associated with plant roots: A new understanding of niche-partitioning in plant communities. *Funct Ecol.* 2021;35(8):1768–82. <https://doi.org/10.1111/1365-2435.13804>
22. Shah MA, Reshi Z, Rashid I. Mycorrhizal source and neighbour identity differently influence *Anthemis cotula* L. invasion in the Kashmir Himalaya, India. *Appl Soil Ecol.* 2008;40(2):330–7. <https://doi.org/10.1016/j.apsoil.2008.06.002>
23. Crawford KM, Bauer JT, Comita LS, Eppinga MB, Johnson DJ, Mangan SA, et al. When and where plant-soil feedback may promote plant coexistence: A meta-analysis. *Ecol Lett.* 2019;22(8):1274–84. <https://doi.org/10.1111/ele.13278> PMID: 31149765
24. Kulmatiski A, Beard KH, Stevens JR, Cobbold SM. Plant-soil feedbacks: A meta-analytical review. *Ecol Lett.* 2008;11(9):980–92. <https://doi.org/10.1111/j.1461-0248.2008.01209.x> PMID: 18522641
25. Forero LE, Grenzer J, Heinze J, Schittko C, Kulmatiski A. Greenhouse- and field-measured plant-soil feedbacks are not correlated. *Front Environ Sci.* 2019;7. <https://doi.org/10.3389/fenvs.2019.00184>
26. Lekberg Y, Bever JD, Bunn RA, Callaway RM, Hart MM, Kivlin SN, et al. Relative importance of competition and plant-soil feedback, their synergy, context dependency and implications for coexistence. *Ecol Lett.* 2018;21(8):1268–81. <https://doi.org/10.1111/ele.13093> PMID: 29896848
27. J. Gundale M, Kardol P. Multi-dimensionality as a path forward in plant-soil feedback research. *J Ecol.* 2021;109(10):3446–65. <https://doi.org/10.1111/1365-2745.13679>
28. Piper CL, Siciliano SD, Winsley T, Lamb EG. Smooth brome invasion increases rare soil bacterial species prevalence, bacterial species richness and evenness. *J Ecol.* 2015;103(2):386–96. <https://doi.org/10.1111/1365-2745.12356>
29. Yang L, Maron JL, Callaway RM. Inhibitory effects of soil biota are ameliorated by high plant diversity. *Oecologia.* 2015;179(2):519–25. <https://doi.org/10.1007/s00442-015-3351-1> PMID: 26001607
30. Peetoom Heida I, Brown C, Dettlaff MA, Oppon KJ, Cahill JF. Presence of a dominant native shrub is associated with minor shifts in the function and composition of grassland communities in a northern savannah. *AoB Plants.* 2021;13(2):plab011. <https://doi.org/10.1093/aobpla/plab011> PMID: 33889378
31. Bailey AW. Barrier effect of the shrub *elaegnus commutata* on grazing cattle and forage production in central Alberta. *J Range Manag.* 1970;23(4):248. <https://doi.org/10.2307/3896214>
32. Bennett JA, Maherali H, Reinhart KO, Lekberg Y, Hart MM, Klironomos J. Plant-soil feedbacks and mycorrhizal type influence temperate forest population dynamics. *Science.* 2017;355(6321):181–4. <https://doi.org/10.1126/science.aai8212> PMID: 28082590
33. Farrer EC, Suding KN. Teasing apart plant community responses to N enrichment: The roles of resource limitation, competition and soil microbes. *Ecol Lett.* 2016;19(10):1287–96. <https://doi.org/10.1111/ele.12665> PMID: 27531674
34. Whysong GL, Bailey AW. Production and nitrogen content of herbage in a silverberry (*elaegnus commutata*) community compared to adjacent grassland and forest communities. *Can J Plant Sci.* 1975;55(3):801–8. <https://doi.org/10.4141/cjps75-124>
35. Bailey AW, Gupta RK. Grass-woody plant relationships. *Can J Plant Sci.* 1973;53(3):671–6. <https://doi.org/10.4141/cjps73-132>
36. Pernilla Brinkman E, Van der Putten WH, Bakker E, Verhoeven KJF. Plant-soil feedback: experimental approaches, statistical analyses and ecological interpretations. *J Ecol.* 2010;98(5):1063–73. <https://doi.org/10.1111/j.1365-2745.2010.01695.x>
37. Brown C, Oppon KJ, Cahill JF. Species-specific size vulnerabilities in a competitive arena: Nutrient heterogeneity and soil fertility alter plant competitive size asymmetries. *Funct Ecol.* 2019;33(8):1491–503. <https://doi.org/10.1111/1365-2435.13340>
38. Chagnon P, Brown C, Stotz GC, Cahill JF. Soil biotic quality lacks spatial structure and is positively associated with fertility in a northern grassland. *Journal of Ecology.* 2017;106(1):195–206. <https://doi.org/10.1111/1365-2745.12844>
39. R Core Team. R: The R Project for Statistical Computing. <https://www.r-project.org/>. 2022.
40. Bates D, Mächler M, Bolker B, Walker S. Fitting Linear Mixed-Effects Models Using lme4. *J Stat Soft.* 2015;67(1). <https://doi.org/10.18637/jss.v067.i01>
41. Fox J, Weisberg S. *An R Companion to Applied Regression.* Los Angeles London New Delhi Singapore Washington, DC Melbourne: Sage Publications Inc. 2018.
42. Lenth RV, Banfai B, Bolker B, Buerkner P, Giné-Vázquez I, Herve M. Emmeans: Estimated Marginal Means, aka Least-Squares Means. <https://cran.r-project.org/web/packages/emmeans/index.html>. 2024.
43. van de Voorde TFJ, van der Putten WH, Martijn Bezemer T. Intra- and interspecific plant-soil interactions, soil legacies and priority effects during old-field succession. *J Ecol.* 2011;99(4):945–53. <https://doi.org/10.1111/j.1365-2745.2011.01815.x>
44. Casper BB, Castelli JP. Evaluating plant-soil feedback together with competition in a serpentine grassland. *Ecol Lett.* 2007;10(5):394–400. <https://doi.org/10.1111/j.1461-0248.2007.01030.x> PMID: 17498138
45. Mangla S, Callaway RM. Exotic invasive plant accumulates native soil pathogens which inhibit native plants. *J Ecol.* 2007;96(1):58–67. <https://doi.org/10.1111/j.1365-2745.2007.01312.x>
46. Allen WJ, Meyerson LA, Flick AJ, Cronin JT. Intraspecific variation in indirect plant-soil feedbacks influences a wetland plant invasion. *Ecology.* 2018;99(6):1430–40. <https://doi.org/10.1002/ecy.2344> PMID: 29771449
47. Bueno de Mesquita CP, Schmidt SK, Suding KN. Litter-driven feedbacks influence plant colonization of a high elevation early successional ecosystem. *Plant Soil.* 2019;444(1–2):71–85. <https://doi.org/10.1007/s11104-019-04242-3>

48. Ulbrich TC, Rivas-Ubach A, Tiemann LK, Friesen ML, Evans SE. Plant root exudates and rhizosphere bacterial communities shift with neighbor context. *Soil Biology and Biochemistry*. 2022;172:108753. <https://doi.org/10.1016/j.soilbio.2022.108753>
49. Steltzer H, Bowman WD. Original Articles: Differential Influence of Plant Species on Soil Nitrogen Transformations Within Moist Meadow Alpine Tundra. *Ecosystems*. 1998;1(5):464–74. <https://doi.org/10.1007/s100219900042>
50. Anacker BL, Klironomos JN, Maherali H, Reinhart KO, Strauss SY. Phylogenetic conservatism in plant-soil feedback and its implications for plant abundance. *Ecol Lett*. 2014;17(12):1613–21. <https://doi.org/10.1111/ele.12378> PMID: [25328022](https://pubmed.ncbi.nlm.nih.gov/25328022/)
51. Mehrabi Z, Tuck SL. Relatedness is a poor predictor of negative plant-soil feedbacks. *New Phytol*. 2015;205(3):1071–5. <https://doi.org/10.1111/nph.13238> PMID: [25557183](https://pubmed.ncbi.nlm.nih.gov/25557183/)
52. Fitzpatrick CR, Gehant L, Kotanen PM, Johnson MTJ. Phylogenetic relatedness, phenotypic similarity and plant–soil feedbacks. *Journal of Ecology*. 2017;105:786–800. <https://doi.org/10.1111/1365-2745.12709>
53. Baxendale C, Orwin KH, Poly F, Pommier T, Bardgett RD. Are plant-soil feedback responses explained by plant traits?. *New Phytol*. 2014;204(2):408–23. <https://doi.org/10.1111/nph.12915> PMID: [24995955](https://pubmed.ncbi.nlm.nih.gov/24995955/)
54. Heinen R, van der Sluijs M, Biere A, Harvey JA, Bezemer TM. Plant community composition but not plant traits determine the outcome of soil legacy effects on plants and insects. *J Ecol*. 2017;106(3):1217–29. <https://doi.org/10.1111/1365-2745.12907>
55. Huangfu C, Zhang L, Hui D. Density-dependent plant-soil feedbacks of two plant species affected by plant competition. *Sci Total Environ*. 2022;807(Pt 2):150908. <https://doi.org/10.1016/j.scitotenv.2021.150908> PMID: [34653462](https://pubmed.ncbi.nlm.nih.gov/34653462/)
56. Hausmann NT, Hawkes CV. Plant neighborhood control of arbuscular mycorrhizal community composition. *New Phytol*. 2009;183(4):1188–200. <https://doi.org/10.1111/j.1469-8137.2009.02882.x> PMID: [19496954](https://pubmed.ncbi.nlm.nih.gov/19496954/)
57. Bever JD, Dickie IA, Facelli E, Facelli JM, Klironomos J, Moora M, et al. Rooting theories of plant community ecology in microbial interactions. *Trends Ecol Evol*. 2010;25(8):468–78. <https://doi.org/10.1016/j.tree.2010.05.004> PMID: [20557974](https://pubmed.ncbi.nlm.nih.gov/20557974/)
58. Rillig MC, Antonovics J, Caruso T, Lehmann A, Powell JR, Veresoglou SD, et al. Interchange of entire communities: Microbial community coalescence. *Trends Ecol Evol*. 2015;30(8):470–6. <https://doi.org/10.1016/j.tree.2015.06.004> PMID: [26111582](https://pubmed.ncbi.nlm.nih.gov/26111582/)
59. in 't Zandt D, van den Brink A, de Kroon H, Visser EJW. Plant-soil feedback is shut down when nutrients come to town. *Plant Soil*. 2019;439(1–2):541–51. <https://doi.org/10.1007/s11104-019-04050-9>
60. van der Heijden MGA, Klironomos JN, Ursic M, Moutoglou P, Streitwolf-Engel R, Boller T, et al. Mycorrhizal fungal diversity determines plant biodiversity, ecosystem variability and productivity. *Nature*. 1998;396(6706):69–72. <https://doi.org/10.1038/23932>
61. Delgado-Baquerizo M, Maestre FT, Reich PB, Jeffries TC, Gaitan JJ, Encinar D, et al. Microbial diversity drives multifunctionality in terrestrial ecosystems. *Nat Commun*. 2016;7:10541. <https://doi.org/10.1038/ncomms10541> PMID: [26817514](https://pubmed.ncbi.nlm.nih.gov/26817514/)
62. Lauber CL, Hamady M, Knight R, Fierer N. Pyrosequencing-based assessment of soil pH as a predictor of soil bacterial community structure at the continental scale. *Appl Environ Microbiol*. 2009;75(15):5111–20. <https://doi.org/10.1128/AEM.00335-09> PMID: [19502440](https://pubmed.ncbi.nlm.nih.gov/19502440/)
63. Rousk J, Bååth E, Brookes PC, Lauber CL, Lozupone C, Caporaso JG, et al. Soil bacterial and fungal communities across a pH gradient in an arable soil. *ISME J*. 2010;4(10):1340–51. <https://doi.org/10.1038/ismej.2010.58> PMID: [20445636](https://pubmed.ncbi.nlm.nih.gov/20445636/)
64. Jastrow JD, Miller RM. Neighbor influences on root morphology and mycorrhizal fungus colonization in tallgrass prairie plants. *Ecology*. 1993;74(2):561–9. <https://doi.org/10.2307/1939316>
65. Pérez M, Urcelay C. Differential growth response to arbuscular mycorrhizal fungi and plant density in two wild plants belonging to contrasting functional types. *Mycorrhiza*. 2009;19(8):517–23. <https://doi.org/10.1007/s00572-009-0254-1> PMID: [19444488](https://pubmed.ncbi.nlm.nih.gov/19444488/)
66. Kardol P, De Deyn GB, Laliberté E, Mariotte P, Hawkes CV. Biotic plant–soil feedbacks across temporal scales. *J Ecol*. 2013;101(2):309–15. <https://doi.org/10.1111/1365-2745.12046>
67. van der Heijden MGA, Bardgett RD, van Straalen NM. The unseen majority: soil microbes as drivers of plant diversity and productivity in terrestrial ecosystems. *Ecol Lett*. 2008;11(3):296–310. <https://doi.org/10.1111/j.1461-0248.2007.01139.x> PMID: [18047587](https://pubmed.ncbi.nlm.nih.gov/18047587/)
